# Supplementary material for: Posttranscriptional upregulation of HER3 by HER2 mRNA induces trastuzumab resistance in breast cancer
Source: PubMed Central journal article supplement (PMC6090962; doi:10.1186/s12943-018-0862-5), 2018-08-02

# Figure S1

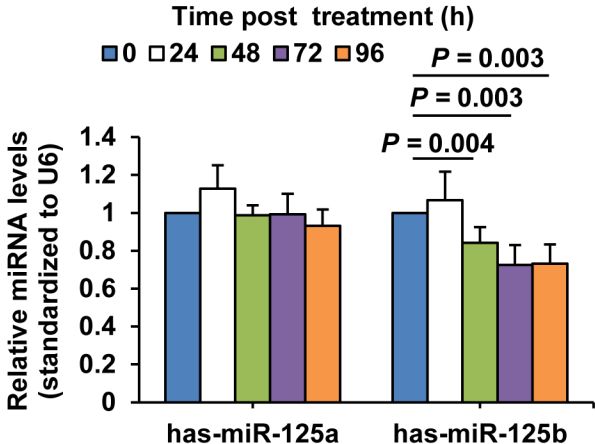

Supplement: 12943_2018_862_MOESM5_ESM.pdf [file 12943_2018_862_MOESM5_ESM.pdf]
