# Supplementary material for: Posttranscriptional upregulation of HER3 by HER2 mRNA induces trastuzumab resistance in breast cancer
Source: Springer Nature journal article supplement (doi:10.1186/s12943-018-0862-5), 2018-08-02
Supplement: MOESM8 [file 15997116]

Figure S4

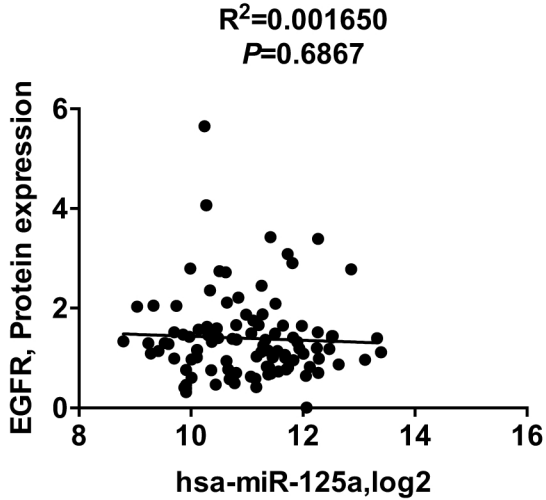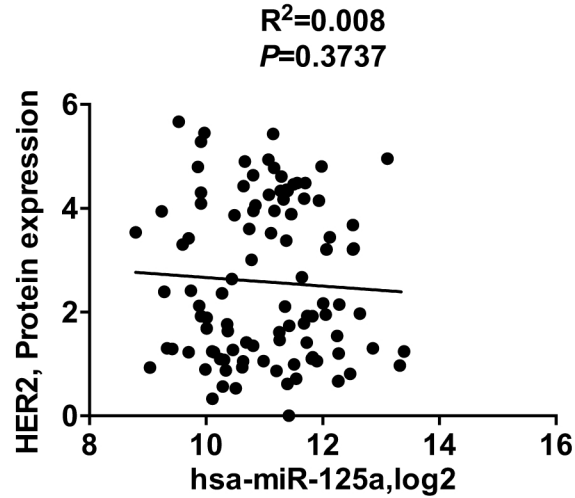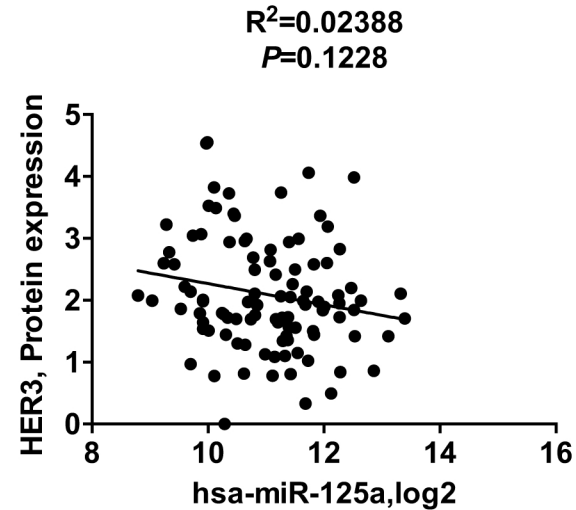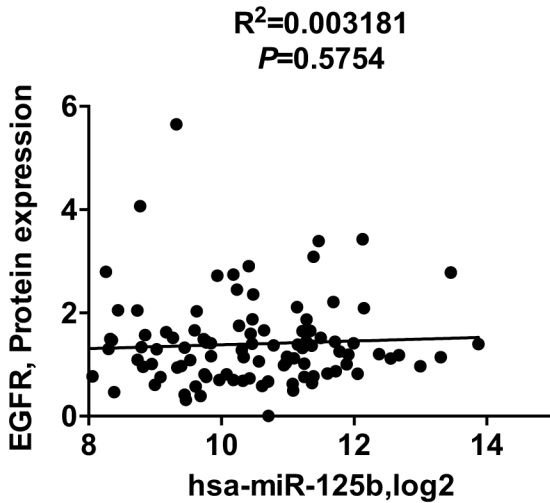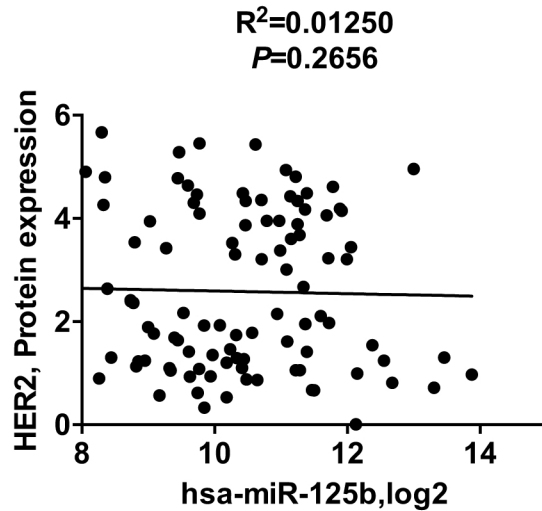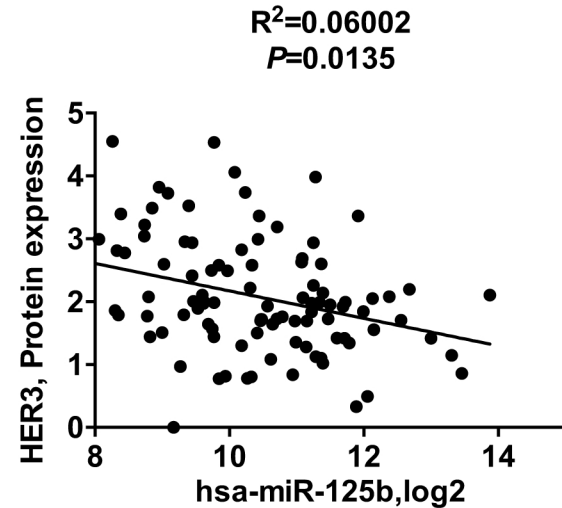

TCGA
