# Supplementary material for: Posttranscriptional upregulation of HER3 by HER2 mRNA induces trastuzumab resistance in breast cancer
Source: Springer Nature journal article supplement (doi:10.1186/s12943-018-0862-5), 2018-08-02

# Figure S5

■ Control

■ HER3 3'UTR

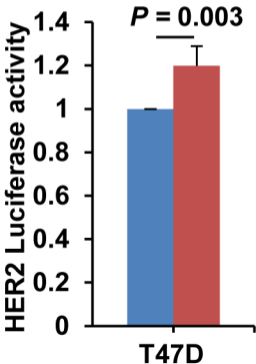

Supplement: MOESM9 [file 15997116]
