# Supplementary material for: Posttranscriptional upregulation of HER3 by HER2 mRNA induces trastuzumab resistance in breast cancer
Source: Springer Nature journal article supplement (doi:10.1186/s12943-018-0862-5), 2018-08-02
Supplement: MOESM10 [file 15997116]

# Figure S6

Trastuzumab (  $\mu\text{g/ml}$  )

0

0.1

1

10

100

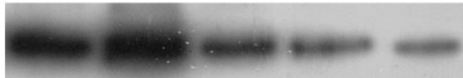

HER2

1.0

1.1

0.7

0.6

0.5

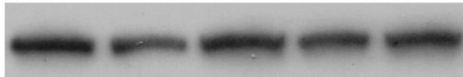

$\alpha$ -Tubulin
