# Supplementary material for: Posttranscriptional upregulation of HER3 by HER2 mRNA induces trastuzumab resistance in breast cancer
Source: Mol Cancer. 2018 Aug 2;17:113. doi: 10.1186/s12943-018-0862-5 (PMC6090962; doi:10.1186/s12943-018-0862-5)
Supplement: Supplementary file 4 — Table S4. miRNAs binding sites prediction in human HER2 and HER3 3’UTR. (XLSX 26 kb) [file 12943_2018_862_MOESM4_ESM.xlsx]

## Sheet: Sheet1
Erbb2 targeted miRNA family	Total context++ score	Erbb3 UTR targeted miRNA family	Total context++ score	shared miRNA family
miR-17-5p/20-5p/93-5p/106-5p/519-3p/526-3p	-0.01	miR-22-3p	-0.47	miR-6778-3p
miR-3064-5p/6504-5p	-0.27	miR-148-3p/152-3p	-0.43	miR-5088-5p
miR-146-5p/7153-5p	-0.02	miR-19-3p	-0.19	miR-204-3p/4646-5p
miR-375	-0.12	miR-130-3p/301-3p/3666/4295/454-3p	-0.25	miR-4314
miR-183-5p.1	-0.04	miR-205-5p	-0.13	miR-27a-5p
miR-125-5p/4319	-0.11	miR-17-5p/20-5p/93-5p/106-5p/519-3p/526-3p	-0.25	miR-378
miR-204-5p/211-5p	-0.02	miR-125-5p/4319	-0.32	miR-5580-5p
miR-155-5p	-0.07	miR-145-5p/5195-3p	-0.16	miR-6731-5p/8085
miR-1-3p/206/613	-0.02	miR-96-5p/1271-5p	-0.32	miR-4779
miR-34-5p/449-5p	-0.34	miR-182-5p	-0.23	miR-7106-3p
miR-133-3p.1	-0.12	miR-24-3p	-0.38	miR-4667-5p/4700-5p/8089
miR-18-5p/4735-3p	-0.25	miR-143-3p/4770/6088	-0.17	miR-3158-3p
miR-193a-5p	-0.24	miR-124-3p.2/506-3p	-0.22	miR-877-3p
miR-331-3p	-0.34	miR-221-3p/222-3p	-0.09	miR-6878-3p
miR-873-5p.2	-0.31	miR-183-5p.2	-0.23	miR-512-3p
miR-326/330-5p	-0.2	miR-3064-5p/6504-5p	-0.07	miR-125-5p/4319
miR-423-5p/3184-5p	-0.19	miR-204-5p/211-5p	-0.11	miR-4287/4685-3p
miR-483-3p.1	-0.18	miR-150-5p	-0.04	miR-544b
miR-491-5p	-0.16	miR-124-3p.1	-0.28	miR-4687-3p
miR-1197	-0.16	miR-27-3p	-0.08	miR-1343-3p/6783-3p
miR-6835-3p	-0.15	miR-135-5p	-0.09	miR-149-5p
miR-378-3p/422	-0.13	miR-214-5p	-0.01	miR-3117-3p
miR-377-3p	-0.12	miR-193a-5p	-0.18	miR-3173-3p/6891-5p
miR-665	-0.12	miR-302-3p/372-3p/373-3p/520-3p	-0.26	miR-6749-3p
miR-299-3p	-0.09	miR-149-5p	-0.46	miR-320
miR-149-5p	-0.08	miR-431-5p	-0.27	miR-7155-5p
miR-185-5p/4306/4644	-0.07	miR-483-3p.1	-0.2	miR-198
miR-493-3p	-0.04	miR-670-3p	-0.2	miR-622
miR-1224-5p	-0.04	miR-185-5p/4306/4644	-0.19	miR-6780a-3p
miR-370-5p	-0.03	miR-335-5p	-0.19	miR-6881-3p
miR-411-5p.1	-0.02	miR-299-5p	-0.17	miR-1231
miR-532-3p	-0.02	miR-874-3p	-0.14	miR-7515
miR-485-5p/6884-5p	-0.02	miR-665	-0.12	miR-664-5p/4794
miR-670-3p	-0.02	miR-324-5p	-0.11	miR-6801-3p/6810-3p
miR-328-5p/6885-5p	-1.31	miR-151-3p	-0.1	miR-7111-3p
miR-4292/6791-5p	-0.86	miR-362-5p/500-5p	-0.07	miR-7160-5p
miR-4505/5787	-0.79	miR-331-3p	-0.07	miR-1237-3p
miR-6756-5p/6766-5p	-0.74	miR-320/4429	-0.06	miR-4434/4516/5703
miR-486-3p	-0.64	miR-6835-3p	-0.06	miR-6868-3p
miR-4656	-0.62	miR-371-5p	-0.03	miR-4790-3p
miR-185-3p	-0.61	miR-186-5p	-0.01	miR-516b-5p
miR-128-5p	-0.55	miR-496.1	-0.01	miR-583
miR-6769-5p	-0.55	miR-4759	-0.6	miR-181a-2-3p
miR-4456	-0.54	miR-3199/8052	-0.56	miR-4699-5p
miR-6721-5p	-0.53	miR-3170/6855-5p	-0.55	miR-670-3p
miR-3918	-0.52	miR-656-5p	-0.55	miR-4276
miR-4731-5p	-0.51	miR-3158-3p	-0.5	miR-6815-3p
miR-762/4492/4498/5001-5p	-0.51	miR-1302/4298	-0.48	miR-4764-5p
miR-7112-5p	-0.5	miR-1909-5p	-0.47	miR-6830-3p
miR-541-3p/654-5p	-0.48	miR-6732-5p	-0.46	miR-3124-3p
miR-4530	-0.48	miR-1273g-3p	-0.45	miR-1252-3p
miR-6795-5p/6887-5p	-0.45	miR-204-3p/4646-5p	-0.41	miR-4680-3p
miR-6727-5p	-0.44	miR-4314	-0.4	miR-127-5p
miR-3127-5p	-0.44	miR-4276	-0.39	miR-186-3p
miR-7109-5p	-0.43	miR-1287-5p	-0.37	miR-548e-5p
miR-4638-3p	-0.43	miR-5088-5p	-0.37	miR-520-3p
miR-1296-5p	-0.42	miR-877-3p	-0.36	miR-1273g-3p
miR-1915-3p/6764-5p	-0.42	miR-6894-5p	-0.36	miR-3928-5p/6806-3p
miR-6852-5p	-0.4	miR-4515	-0.36	miR-5190
miR-3652/4430	-0.37	miR-6835-5p	-0.35	miR-5697
miR-4512	-0.37	miR-7106-3p	-0.35	miR-6832-3p
miR-6859-3p	-0.37	miR-8056	-0.35
miR-6867-3p	-0.37	miR-519-3p	-0.34
miR-1587/3620-5p	-0.36	miR-5580-5p	-0.34
miR-4675/4741	-0.36	miR-592	-0.34
miR-4754	-0.36	miR-4505/5787	-0.34
miR-214-3p/761/3619-5p	-0.35	miR-6852-5p	-0.34
miR-4792	-0.35	miR-6878-3p	-0.33
miR-1207-5p/4763-3p	-0.34	miR-4477b	-0.33
miR-6165	-0.34	miR-4509	-0.33
miR-6895-5p	-0.34	miR-4437	-0.33
miR-520-5p/525-5p	-0.34	miR-6749-3p	-0.33
miR-6778-3p	-0.33	miR-6778-3p	-0.32
miR-6748-5p	-0.33	miR-4716-3p/6794-5p	-0.32
miR-6846-5p/6848-5p	-0.33	miR-219-5p	-0.32
miR-593-5p	-0.32	miR-4446-3p	-0.32
miR-4326	-0.32	miR-320	-0.31
miR-7160-3p	-0.31	miR-7851-3p	-0.31
miR-5090/6775-5p	-0.31	miR-2110	-0.31
miR-7150	-0.31	miR-548/4445-3p	-0.3
miR-711	-0.31	miR-8078	-0.3
miR-635/6774-5p	-0.3	miR-1255-5p	-0.3
miR-4455	-0.3	miR-7160-5p	-0.3
miR-3162-3p	-0.3	miR-4425	-0.3
miR-4713-5p	-0.3	miR-612/1285-3p/3187-5p/5189-5p/6860	-0.29
miR-4308	-0.29	miR-135-3p	-0.29
miR-4736	-0.29	miR-6780a-3p	-0.29
miR-6747-5p	-0.29	miR-512-3p	-0.29
let-7d-3p	-0.29	miR-6815-3p	-0.29
miR-3677-5p	-0.28	miR-6731-5p/8085	-0.29
miR-211-3p	-0.27	miR-378	-0.29
miR-3679-3p	-0.27	miR-623	-0.29
miR-6836-3p	-0.27	miR-6760-5p	-0.29
miR-4790-5p	-0.27	miR-593-5p	-0.28
miR-1254/3116	-0.27	miR-6888-3p	-0.28
miR-6861-5p	-0.26	miR-27a-5p	-0.28
miR-3664-5p	-0.26	miR-1273-5p/30-3p/3689-3p/6779-5p/6780-5p	-0.28
miR-5088-5p	-0.26	miR-6751-5p/6803-5p	-0.28
miR-3202	-0.26	miR-5192	-0.27
miR-4677-5p	-0.26	miR-6503-3p	-0.27
miR-1825	-0.26	miR-544b	-0.27
miR-1227-5p	-0.26	miR-4668-5p	-0.27
miR-3130-5p/4482-5p	-0.26	miR-365-5p	-0.27
miR-940/6808-5p/6893-5p	-0.25	miR-1237-3p	-0.27
miR-564	-0.25	miR-3663-3p	-0.27
miR-4685-5p/6837-5p	-0.25	miR-7106-5p	-0.27
miR-3657	-0.25	miR-3153/6733-5p/6739-5p	-0.27
miR-204-3p/4646-5p	-0.24	miR-3649	-0.27
miR-1202/3972	-0.24	miR-4278	-0.27
miR-4726-3p	-0.24	miR-4713-3p	-0.26
miR-323-5p/410-5p/494-5p	-0.24	miR-3162-5p	-0.26
miR-4314	-0.24	miR-185-3p	-0.26
let-7e-3p	-0.23	miR-8083	-0.25
miR-3667-3p	-0.23	miR-6798-3p	-0.25
miR-6805-5p	-0.23	miR-6878-5p	-0.25
miR-3622b-5p	-0.23	miR-4254	-0.25
miR-609	-0.23	miR-1238-3p	-0.25
miR-4433a-5p	-0.23	miR-376bc-5p	-0.25
miR-4650-5p	-0.23	miR-4743-3p	-0.25
miR-3175	-0.23	miR-4266	-0.25
miR-361-3p	-0.23	miR-758-5p	-0.24
miR-5007-5p	-0.22	miR-31-3p	-0.24
miR-4471/8059	-0.22	miR-4324	-0.24
miR-514-5p	-0.22	miR-4667-5p/4700-5p/8089	-0.24
miR-6772-5p	-0.22	miR-4779	-0.24
miR-6826-3p	-0.22	miR-92a-1-5p	-0.24
miR-6072/6891-3p	-0.22	miR-4433b-3p	-0.24
miR-4489	-0.22	miR-1256	-0.24
miR-3064-3p	-0.22	miR-1254/3116	-0.24
miR-221-5p/8073	-0.22	miR-3169	-0.23
miR-6762-5p/6845-5p	-0.22	miR-6752-5p/6842-5p/7110-5p	-0.23
miR-1224-3p	-0.21	miR-7155-5p	-0.23
miR-608/4651	-0.21	miR-7109-3p	-0.23
miR-891-3p	-0.21	miR-3944-5p	-0.23
miR-605-3p	-0.21	miR-6811-3p	-0.23
miR-548au-3p	-0.21	miR-4721	-0.23
miR-6752-3p	-0.21	miR-4312	-0.23
miR-363-5p/6745	-0.21	miR-6733-3p	-0.22
miR-4533	-0.21	miR-219a-2-3p	-0.22
miR-27a-5p	-0.21	miR-5095/7151-3p	-0.22
miR-6730-3p	-0.21	miR-4640-3p	-0.22
miR-6825-5p	-0.2	miR-1915-5p	-0.22
miR-4315	-0.2	miR-4675/4741	-0.22
miR-203-5p/6718-5p	-0.2	miR-371b-3p	-0.22
miR-597-3p	-0.2	miR-3691-5p	-0.22
miR-6126	-0.2	miR-4674	-0.22
miR-6739-3p	-0.2	miR-193b-5p	-0.21
miR-939-5p/1343-5p	-0.2	miR-4744	-0.21
miR-377-5p/6086	-0.2	miR-3652/4430	-0.21
miR-4508	-0.2	miR-3605-5p	-0.21
miR-3192-5p	-0.2	miR-802	-0.21
miR-7845-5p	-0.19	miR-1324	-0.21
miR-3151-5p	-0.19	miR-5589-3p	-0.21
miR-1295-5p/1912	-0.19	miR-3192-5p	-0.2
miR-1238-5p/4758-5p	-0.19	miR-550-5p/1271-3p	-0.2
miR-4734	-0.19	miR-584-5p	-0.2
miR-6846-3p	-0.19	miR-3202	-0.2
miR-452-3p	-0.18	miR-4787-3p	-0.2
miR-4658/6790-5p	-0.18	miR-4727-5p	-0.2
miR-1972	-0.18	miR-5582-5p	-0.2
miR-4782-5p/5706	-0.18	miR-4450	-0.2
miR-6776-5p	-0.18	miR-6085/6813-5p	-0.19
miR-378	-0.18	miR-4687-3p	-0.19
miR-6795-3p	-0.18	miR-619-3p	-0.19
miR-4268	-0.18	miR-3675-3p	-0.19
miR-6724-5p/6773-5p	-0.18	miR-3928-5p/6806-3p	-0.19
miR-4447/4472	-0.17	miR-6832-5p	-0.19
miR-23-5p	-0.17	miR-3117-3p	-0.19
miR-3688-5p	-0.17	miR-4645-3p	-0.19
miR-6796-5p	-0.17	miR-1321/4739/4756-5p	-0.19
miR-593-3p	-0.17	miR-3173-3p/6891-5p	-0.19
miR-875-3p	-0.17	miR-3150-5p	-0.18
miR-888-3p	-0.17	miR-4752	-0.18
miR-574-5p	-0.17	miR-6081	-0.18
miR-4720-5p/4799-3p/5588-5p	-0.17	miR-4757-5p/6744-3p	-0.18
miR-6809-5p	-0.16	miR-1200	-0.18
miR-3150-3p/6763-5p	-0.16	miR-3157-3p	-0.18
miR-1299	-0.16	miR-762/4492/4498/5001-5p	-0.18
miR-5586-5p	-0.16	miR-1207-3p	-0.18
miR-6731-5p/8085	-0.16	miR-3692-5p	-0.18
miR-5580-5p	-0.16	miR-6857-5p	-0.18
miR-4660	-0.16	miR-4423-5p	-0.18
miR-6132/6836-5p	-0.16	miR-4769-3p/6817-5p	-0.18
miR-1226-3p	-0.16	miR-6881-3p	-0.17
miR-7855-5p	-0.15	miR-5001-3p	-0.17
miR-4714-5p	-0.15	miR-33-3p/515-3p/519-3p	-0.17
miR-4468	-0.15	miR-452-3p	-0.17
miR-4779	-0.15	miR-200-5p/550-3p	-0.17
miR-3120-5p	-0.15	miR-450a-2-3p	-0.17
miR-6867-5p	-0.15	miR-6828-5p	-0.17
miR-4417	-0.15	miR-4491/4657	-0.17
miR-6804-5p	-0.15	miR-210-5p	-0.17
miR-6716-5p	-0.15	miR-4269/6715-5p	-0.17
miR-3152-5p	-0.15	miR-6873-5p	-0.17
miR-4299	-0.15	miR-1231	-0.17
miR-5690	-0.15	miR-4764-5p	-0.16
miR-1298-3p	-0.15	miR-323-5p/410-5p/494-5p	-0.16
miR-7106-3p	-0.14	miR-4691-5p/6792-3p	-0.16
miR-4667-5p/4700-5p/8089	-0.14	miR-1304-3p	-0.16
miR-92a-2-5p	-0.14	miR-3681-5p/6849-5p	-0.16
miR-1295	-0.14	miR-3130-5p/4482-5p	-0.16
miR-4514/4692	-0.14	miR-6843-3p/6848-3p	-0.16
miR-6734-3p	-0.14	miR-5584-3p	-0.16
miR-5004-5p	-0.14	miR-3685	-0.16
miR-619-5p/6506-5p	-0.14	miR-3689/6851-5p	-0.16
miR-7847-3p	-0.14	miR-4446-5p	-0.15
miR-6742-5p	-0.14	miR-4474-3p	-0.15
miR-6728-3p	-0.14	miR-6804-3p	-0.15
miR-765	-0.14	miR-520f-5p	-0.15
miR-1292-5p	-0.14	miR-6728-3p	-0.15
miR-4421/5699-3p	-0.14	miR-3682-3p	-0.15
miR-6512-3p/6720-5p	-0.13	miR-3123	-0.15
miR-7152-3p	-0.13	miR-1253	-0.15
miR-6737-5p/6812-5p/6819-5p	-0.13	miR-30-3p/6788-5p	-0.15
miR-4476/6876-5p	-0.13	miR-6800-5p	-0.15
miR-2861	-0.13	miR-492	-0.15
miR-6842-3p	-0.13	miR-1343-3p/6783-3p	-0.15
miR-7974	-0.13	miR-631/3661	-0.15
miR-660-5p	-0.13	miR-4755-5p/5006-3p	-0.15
miR-6736-3p	-0.13	miR-4287/4685-3p	-0.14
miR-4725-5p	-0.13	miR-155-3p	-0.14
miR-7977	-0.13	miR-6758-5p/6856-5p	-0.14
miR-2355-5p	-0.13	miR-4484	-0.14
miR-1260	-0.13	miR-3938	-0.14
miR-3125/3916/6859-5p	-0.12	miR-4293	-0.14
miR-877-3p	-0.12	miR-597-5p	-0.14
miR-4697-3p	-0.12	miR-892-5p	-0.14
miR-3158-3p	-0.12	miR-6805-5p	-0.14
miR-6764-3p/6824-3p	-0.12	miR-4434/4516/5703	-0.14
miR-512-3p	-0.12	miR-4486	-0.14
miR-6829-5p	-0.12	miR-6841-3p	-0.14
miR-708-3p	-0.12	miR-5092	-0.14
miR-3670	-0.12	miR-4524a-3p	-0.14
miR-7978	-0.12	miR-6737-5p/6812-5p/6819-5p	-0.14
miR-6878-3p	-0.12	miR-1537-5p	-0.14
miR-342-5p/4664-5p	-0.12	miR-7515	-0.14
miR-3659	-0.12	miR-4693-3p	-0.13
miR-5588-3p	-0.12	miR-3150-3p/6763-5p	-0.13
miR-4270/4441/6754-5p	-0.12	miR-4781-3p	-0.13
miR-3911	-0.12	miR-3691-3p	-0.13
miR-1236-3p	-0.11	miR-4428	-0.13
miR-548-5p/559	-0.11	miR-198	-0.13
miR-6757-5p	-0.11	miR-7974	-0.13
miR-4520-3p	-0.11	miR-619-5p/6506-5p	-0.13
miR-4459	-0.11	miR-664-5p/4794	-0.13
miR-629-3p	-0.11	miR-5010-3p	-0.13
miR-4287/4685-3p	-0.11	miR-6765-3p	-0.13
miR-4690-5p	-0.11	miR-450a-1-3p	-0.13
miR-103	-0.11	miR-1265	-0.13
miR-766-5p	-0.11	miR-4255	-0.13
miR-146a-3p	-0.11	miR-567	-0.12
miR-6864-5p	-0.11	miR-3915	-0.12
miR-1293/4483	-0.1	miR-4749-3p	-0.12
miR-4639-3p	-0.1	miR-6830-3p	-0.12
miR-4481/4745-5p	-0.1	miR-6868-3p	-0.12
miR-4279	-0.1	miR-149-3p/4728-5p/6785-5p/6883-5p	-0.12
miR-4506	-0.1	miR-1245/8079	-0.12
miR-6777-3p	-0.1	miR-622	-0.12
miR-4796-3p	-0.1	miR-617	-0.12
miR-4281	-0.1	miR-6131	-0.12
miR-3921/4653-5p	-0.1	miR-3152-5p	-0.12
miR-6868-5p	-0.1	miR-3120-5p	-0.11
miR-6892-3p	-0.1	miR-6079	-0.11
miR-3191-5p	-0.1	miR-4695-5p	-0.11
miR-3194-5p	-0.09	miR-6836-3p	-0.11
miR-3128	-0.09	miR-887-5p	-0.11
miR-648	-0.09	miR-376a-2-5p	-0.11
miR-924	-0.09	miR-4790-3p	-0.11
miR-4687-3p	-0.09	miR-4699-5p	-0.11
miR-4751	-0.09	miR-4271/4725-3p/6780-5p	-0.11
miR-3615	-0.09	miR-297	-0.11
miR-1343-3p/6783-3p	-0.09	miR-4670-3p	-0.11
miR-6791-3p/6829-3p	-0.09	miR-6801-3p/6810-3p	-0.11
miR-657	-0.09	miR-124-5p	-0.11
miR-544b	-0.09	miR-504-3p	-0.11
miR-3173-3p/6891-5p	-0.08	miR-661	-0.1
miR-4297/5581-5p	-0.08	miR-4517	-0.1
miR-450b-5p	-0.08	miR-4263	-0.1
miR-3529-3p	-0.08	miR-1273f	-0.1
miR-6840-3p	-0.08	miR-513a-5p	-0.1
miR-4722-5p	-0.08	miR-516b-5p	-0.1
miR-3117-3p	-0.08	miR-9500	-0.1
miR-5589-5p	-0.08	miR-6514-5p	-0.1
miR-6742-3p	-0.08	miR-4796-3p	-0.1
miR-4464/4748	-0.08	miR-548at-5p	-0.1
miR-4642	-0.08	miR-218-2-3p	-0.1
miR-3140-3p	-0.08	miR-3125/3916/6859-5p	-0.1
miR-2909	-0.07	miR-3611	-0.1
miR-222-5p	-0.07	miR-7856-5p	-0.1
miR-7155-5p	-0.07	miR-4662-3p	-0.1
miR-4273/7156-5p	-0.07	miR-583	-0.1
miR-198	-0.07	miR-6810-5p	-0.09
miR-424-3p	-0.07	miR-1301-3p/5047	-0.09
miR-6849-3p	-0.07	miR-100-3p	-0.09
miR-4493	-0.07	miR-5694	-0.09
miR-6747-3p	-0.07	miR-3130-3p	-0.09
miR-622	-0.07	miR-3201/4791	-0.09
miR-548an	-0.07	miR-7111-3p	-0.09
miR-4688/6743-5p	-0.07	miR-548ao-5p/548ax	-0.09
miR-1266-5p/4518	-0.07	miR-4793-5p	-0.09
miR-320	-0.07	miR-6761-5p	-0.09
miR-1225-3p	-0.07	miR-4720-3p	-0.09
miR-6749-3p	-0.07	miR-2355-5p	-0.09
miR-3943	-0.07	miR-4753-3p	-0.09
miR-4710	-0.06	miR-3124-3p	-0.09
miR-6780a-3p	-0.06	miR-1252-3p	-0.08
miR-548ae-3p/548ah-3p/548aj-3p/548am-3p/548aq-3p/548j-3p/548x-3p	-0.06	miR-1257	-0.08
miR-6881-3p	-0.06	miR-6872-3p	-0.08
miR-3135a	-0.06	miR-93-3p	-0.08
miR-6883-3p	-0.06	miR-1322	-0.08
miR-1910-3p/6511-5p	-0.06	miR-3935	-0.08
miR-548aw	-0.06	miR-3690	-0.08
miR-4290	-0.06	miR-4678	-0.08
miR-664-5p/4794	-0.06	miR-627-3p	-0.08
miR-518-5p/527	-0.06	miR-6799-5p	-0.08
miR-1231	-0.06	miR-4711-3p	-0.08
miR-216-3p	-0.06	miR-500b-3p	-0.08
miR-670-5p	-0.06	miR-3679-3p	-0.08
miR-7515	-0.06	miR-671-5p	-0.08
miR-7113-3p	-0.06	miR-4642	-0.08
miR-4432	-0.05	miR-506-5p	-0.08
miR-507/557	-0.05	miR-676-3p	-0.08
miR-7111-3p	-0.05	miR-4680-3p	-0.08
miR-22-5p	-0.05	miR-4476/6876-5p	-0.07
miR-1295-3p	-0.05	miR-5572	-0.07
miR-3180-5p	-0.05	miR-1276	-0.07
miR-6757-3p	-0.05	miR-1248	-0.07
miR-4691-3p	-0.05	miR-4503	-0.07
miR-6801-3p/6810-3p	-0.05	miR-7848-3p	-0.07
miR-6887-3p	-0.05	miR-130-5p	-0.07
miR-548n	-0.05	miR-127-5p	-0.07
miR-4283	-0.05	miR-186-3p	-0.07
miR-516b-5p	-0.04	miR-641/3617-5p	-0.07
miR-181a-2-3p	-0.04	miR-181a-2-3p	-0.07
miR-500a-3p	-0.04	miR-5190	-0.07
miR-4502	-0.04	miR-4534/8082	-0.07
miR-548q	-0.04	miR-5697	-0.07
miR-6509-3p	-0.04	miR-4802-5p	-0.07
miR-4531	-0.04	miR-6760-3p	-0.07
miR-3160-5p	-0.04	miR-4328	-0.06
miR-1237-3p	-0.04	miR-432-3p	-0.06
miR-651-3p	-0.04	miR-7113-3p	-0.06
miR-5187-3p	-0.04	miR-500-5p	-0.06
miR-1252-5p	-0.04	miR-331-5p	-0.06
miR-4434/4516/5703	-0.04	miR-145-3p	-0.06
miR-6868-3p	-0.04	miR-561-3p	-0.06
miR-7160-5p	-0.04	miR-6742-3p	-0.06
miR-4762-3p	-0.04	miR-1468-3p	-0.06
miR-1245-5p/3142	-0.04	miR-6892-5p	-0.06
miR-3654	-0.04	miR-4290	-0.06
miR-583	-0.04	miR-4452	-0.06
let-7c-3p	-0.04	miR-6832-3p	-0.06
miR-3664-3p	-0.04	miR-5003-3p	-0.06
miR-4790-3p	-0.04	miR-541-5p	-0.06
miR-4457	-0.03	miR-502-5p	-0.06
miR-3135b	-0.03	miR-653-5p	-0.06
miR-6845-3p	-0.03	miR-6514-3p	-0.06
miR-922	-0.03	miR-4475	-0.06
miR-1914-3p/5194/6738-5p	-0.03	miR-8068	-0.06
miR-6830-5p	-0.03	miR-4663	-0.05
miR-2116-5p	-0.03	miR-4502	-0.05
miR-4699-5p	-0.03	miR-6744-5p	-0.05
miR-4799-5p	-0.03	miR-548as-3p	-0.05
miR-4330	-0.03	miR-8077	-0.05
miR-345-3p	-0.03	miR-3529-3p	-0.05
miR-4690-3p/5685	-0.03	miR-548an	-0.05
miR-4795-5p	-0.03	miR-4311	-0.05
miR-6734-5p	-0.03	miR-548ae-3p/548ah-3p/548aj-3p/548am-3p/548aq-3p/548j-3p/548x-3p	-0.05
miR-3127-3p/6756-3p	-0.03	miR-6837-3p	-0.05
miR-634	-0.03	miR-3135b	-0.05
miR-1243	-0.03	miR-548e-5p	-0.05
miR-548-5p/3609	-0.03	miR-4257	-0.05
miR-6816-3p	-0.03	miR-466	-0.05
miR-6128	-0.02	miR-4672	-0.05
miR-3613-3p	-0.02	miR-8076	-0.04
miR-3179	-0.02	miR-4698	-0.04
miR-2117	-0.02	miR-4804-3p	-0.04
miR-6793-3p	-0.02	miR-450b-5p	-0.04
miR-3714	-0.02	miR-4731-3p/4801	-0.04
miR-3663-5p	-0.02	miR-4661-5p	-0.04
miR-298	-0.02	miR-550-3p	-0.04
miR-188-3p	-0.02	miR-4302	-0.04
miR-654-3p	-0.02	miR-520-3p	-0.04
miR-5681a	-0.02	miR-6807-5p	-0.04
miR-642-3p	-0.02	miR-5582-3p	-0.04
miR-520-5p/524-5p	-0.02	miR-6504-3p	-0.04
miR-127-5p	-0.02	miR-6738-3p	-0.04
miR-548e-5p	-0.02	miR-4524b-3p	-0.04
miR-6880-5p	-0.02	miR-6509-3p	-0.04
miR-759	-0.02	miR-6739-3p	-0.04
miR-4694-3p	-0.02	miR-6826-3p	-0.04
miR-520-3p	-0.02	miR-33a-3p	-0.04
miR-5008-3p/6737-3p/7157-3p	-0.02	miR-4438	-0.04
miR-6732-3p	-0.02	miR-2113	-0.03
miR-548/7161-5p	-0.02	miR-1252-5p	-0.03
miR-187-5p	-0.02	miR-3168	-0.03
miR-3662	-0.02	miR-7702	-0.03
miR-545-5p	-0.02	miR-3925-5p	-0.03
miR-6875-3p	-0.02	miR-3185	-0.03
miR-26-5p/1297/4465	-0.02	miR-587	-0.03
miR-4662-5p	-0.02	miR-4799-5p	-0.03
miR-513b-5p	-0.02	miR-3680-3p	-0.03
miR-6870-3p	-0.02	miR-589-3p	-0.03
miR-6770-5p	-0.02	miR-5696	-0.03
miR-6830-3p	-0.02	miR-548az-5p/548t-5p	-0.03
miR-186-3p	-0.02	miR-579-3p/664-3p	-0.03
miR-30-3p	-0.02	miR-3662	-0.03
miR-4427	-0.02	miR-651-3p	-0.03
miR-1283	-0.02	miR-3150-3p/4784	-0.03
miR-5100	-0.02	miR-6740-3p	-0.03
miR-936	-0.02	miR-412-3p/6754-3p	-0.03
miR-1277-5p	-0.02	miR-1193	-0.03
miR-4680-3p	-0.02	miR-345-5p	-0.03
miR-1252-3p	-0.02	miR-4689/6858-5p	-0.03
miR-513-3p	-0.02	miR-3147	-0.03
miR-3121-5p	-0.02	miR-526-5p	-0.02
miR-2467-3p	-0.02	miR-507/557	-0.02
miR-4276	-0.02	miR-4732-5p	-0.02
miR-6124	-0.02	miR-4677-5p	-0.02
miR-6815-3p	-0.02	miR-6768-3p	-0.02
miR-4469	-0.02	miR-3182	-0.02
miR-205-3p	-0.02	miR-6740-5p	-0.02
miR-3124-3p	-0.02	miR-4708-5p	-0.02
miR-4764-5p	-0.02	miR-153-5p	-0.02
miR-29b-1-5p	-0.01	miR-3924	-0.02
miR-515-5p/519-5p	-0.01	miR-4797-5p	-0.02
miR-6507-5p	-0.01	miR-2116-5p	-0.02
miR-1273d	-0.01	miR-511-5p	-0.02
miR-4267	-0.01	miR-3121-3p	-0.02
miR-6832-3p	-0.01	miR-3613-3p	-0.02
miR-125b-2-3p	-0.01	miR-302a-5p	-0.02
miR-505-5p	-0.01	miR-146a-3p	-0.02
miR-5697	-0.01	miR-30-3p	-0.02
miR-329-5p	-0.01	miR-4468	-0.02
miR-548ac/548bb-3p/548d-3p/548h-3p/548z	-0.01	miR-1290	-0.02
miR-5692a	-0.01	miR-6730-5p	-0.02
miR-301-5p	-0.01	miR-4789-3p	-0.02
miR-302bd-5p	-0.01	miR-3119	-0.02
miR-1288-5p	-0.01	miR-5089-5p	-0.02
miR-4732-3p	-0.01	miR-519-5p	-0.02
miR-3928-5p/6806-3p	-0.01	miR-580-3p	-0.02
miR-1273g-3p	-0.01	miR-6124	-0.02
miR-6758-3p	-0.01	miR-6842-3p	-0.02
miR-1470	-0.01	miR-183-3p	-0.02
miR-5190	-0.01	miR-376a-5p	-0.02
miR-4667-3p	-0.01	miR-4277	-0.02
miR-4724-3p	N/A	miR-548aw	-0.02
		miR-141-5p	-0.02
		miR-633	-0.02
		miR-1255-3p	-0.02
		miR-3674	-0.02
		miR-3663-5p	-0.02
		miR-670-5p	-0.02
		miR-5692bc	-0.02
		miR-4252	-0.02
		miR-5011-3p	-0.02
		miR-4433a-3p	-0.02
		miR-338-5p	-0.02
		miR-4261	-0.02
		miR-1272	-0.02
		miR-548aj-5p/548f-5p/548g-5p/548x-5p	-0.02
		miR-6513-3p	-0.02
		miR-4307	-0.02
		miR-548at-3p/548ay-3p	-0.02
		miR-635/6774-5p	-0.02
		miR-4256	-0.02
		miR-345-3p	-0.02
		miR-372-5p	-0.01
		miR-5186	-0.01
		miR-4775	-0.01
		miR-6787-3p	-0.01
		miR-3928-3p	-0.01
		miR-632/4288	-0.01
		miR-4422	-0.01
		miR-6875-3p	-0.01
		miR-5571-5p	-0.01
		miR-4660	-0.01
		miR-551-5p	-0.01
		miR-548ac/548bb-3p/548d-3p/548h-3p/548z	-0.01
		miR-302bd-5p	-0.01
		miR-7152-5p	-0.01
		miR-8063	-0.01
		miR-6890-3p	-0.01
		miR-548aa/548ap-3p/548t-3p	-0.01
		miR-4652-3p	-0.01
		miR-378-5p	-0.01
		miR-4732-3p	-0.01
		miR-4273/7156-5p	-0.01
		miR-5701	-0.01
		miR-1229-3p	-0.01
		miR-3925-3p	-0.01
		miR-939-3p	-0.01
		miR-766-3p	-0.01
		miR-4729	-0.01
		miR-6507-5p	-0.01
		miR-5007-3p	-0.01
		miR-497-3p	-0.01
		miR-578	-0.01
		miR-323b-3p	-0.01
		miR-371-5p/373-5p/616-5p	-0.01
		miR-4464/4748	-0.01
		miR-3941	-0.01
		miR-329-5p	-0.01
		miR-548n	-0.01
		miR-576-5p	-0.01
		miR-4659-3p	-0.01
		miR-4803	-0.01
		miR-5009-3p	-0.01
		miR-16-3p/195-3p	-0.01
		miR-205-3p	-0.01
		miR-143-5p	-0.01
		miR-4735-5p	-0.01
		miR-3163	-0.01
		miR-3074-5p	-0.01
		miR-4778-3p	-0.01
		miR-5583-3p	-0.01
		miR-32-3p	-0.01
		miR-4284	-0.01
		miR-514-3p	-0.01
		miR-3133	-0.01
		miR-301-5p	0
